# Supplementary material for: Indirect oxidation of aluminum under an AC electric field
Source: Royal Society of Chemistry journal article supplement (doi:10.1039/c6ra12811d), 2016-01-01
Supplement: c6ra12811d1.pdf [file c6ra12811d1.pdf]

## Supplementary Information

### Indirect oxidation of aluminum under an AC electric field

Hidetaka Asoh\*, Mami Ishino, Hideki Hashimoto

*Department of Applied Chemistry, Kogakuin University,*

*2665-1 Nakano, Hachioji, Tokyo 192-0015, Japan*

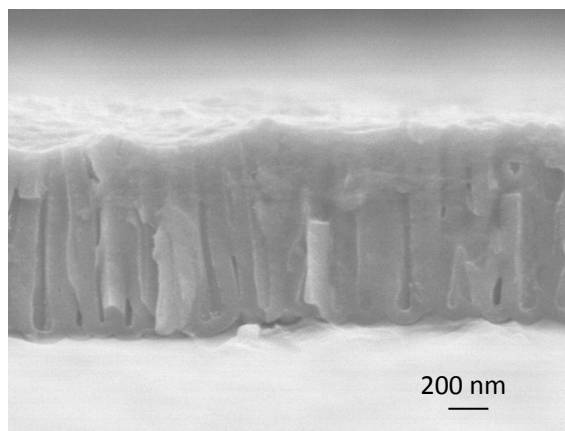

**Figure S1** SEM image of the anodic oxide film formed via conventional DC anodization in 8 mmol·dm<sup>-3</sup> oxalic acid at 20 °C under 60 V for 30 min.
